# Supplementary material for: Lipoteichoic acids from Staphylococcus aureus stimulate proliferation of human non-small-cell lung cancer cells in vitro
Source: Springer Nature journal article supplement (doi:10.1007/s00262-017-1980-4), 2017-03-17
Supplement: 262_2017_1980_MOESM1_ESM.pdf [file 262_2017_1980_MOESM1_ESM.pdf]

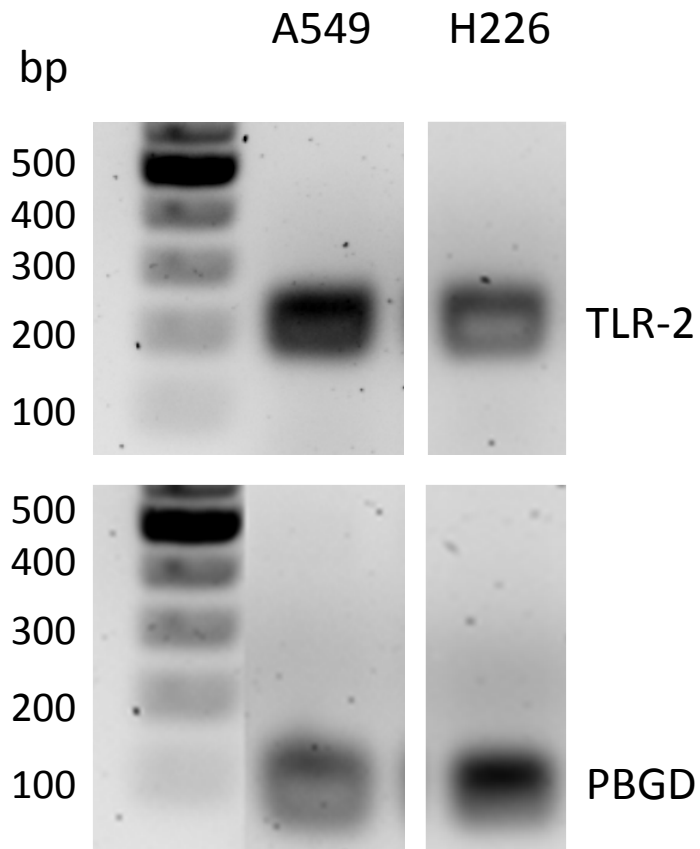

*Supplementary figure 1:*

*TLR-2 expression in A549 and H226 cells*

RT-qPCR of TLR-2 and PBGD mRNA was performed. The qPCR amplicon products were run at 100V at 1,5% agarose gel and stained with ethidium bromide. The amplification products were detected at the expected sizes (200bp for TLR-2).

Hattar et al., supplementary figure 1

*Cancer Immunology, Immunotherapy* (submitted in 2016)
